# Supplementary material for: Anion-induced structural transformation involving interpenetration control and luminescence switching
Source: Royal Society of Chemistry journal article supplement (doi:10.1039/c3ce42164c), 2013-11-22
Supplement: c3ce42164c.pdf [file c3ce42164c.pdf]

## Supporting Materials

### Anion-induced structural transformation involving the interpenetration control and luminescence switching

Cai-Xia Ren,<sup>a</sup> Ai-Li Zheng,<sup>b</sup> Li-Xuan Cai,<sup>a</sup> Cheng Chen,<sup>a</sup> Bin Tan<sup>a</sup> and Jie Zhang<sup>a</sup>

<sup>a</sup> State Key Laboratory of Structural Chemistry, Fujian Institute of Research on the Structure of Matter, Fuzhou, Fujian 350002 P. R. China, Fax: (+86) 591-83710051, E-mail: [zhangjie@fjirsm.ac.cn](mailto:zhangjie@fjirsm.ac.cn).

<sup>b</sup> School of Pharmacy and Biological Sciences, Weifang Medical University, Weifang, Shandong, 261053, P. R. China.

\*\*\*\*\*

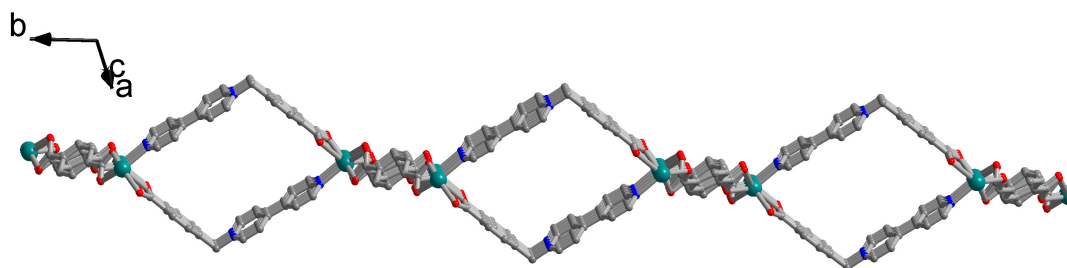

Fig.S1 A view of 1D channel of 2D network in compound 1.

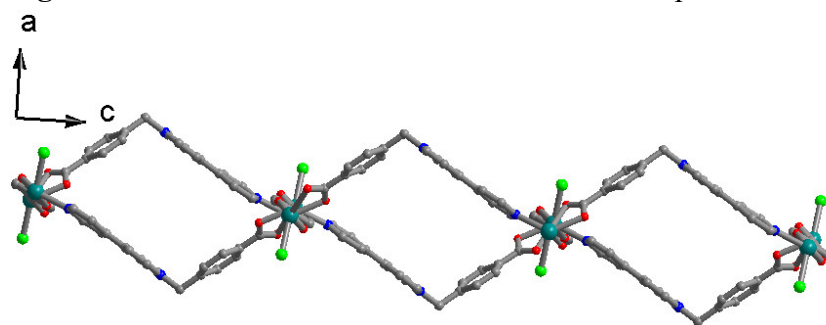

Fig.S2 A view of 1D channel of 2D (6,3) network in compound 2.

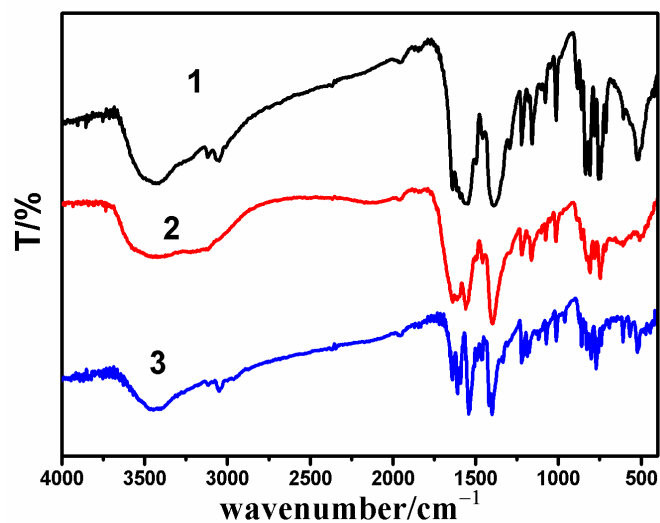

Fig. S3 The IR spectra of three compounds.
